# Supplementary material
Source: publisher figshare collection journal article supplement (https://gsajournals.figshare.com/ndownloader/files/28002717)
Supplement: Supplementary file 1 [file 28002717]

## Sheet: TableS6_SNP
Table S6: Percentage of significant SNPs detected by the GWAS of the virulence (Vir) and host specificity (Spe) relative to the total number of SNPs per chromosomes or genetic regions. The GWAS methods are linear model in Gemma (LM), Ridge regression in BigRR (RR) and bayesian sparse linear mixed model in Gemma (BSLMM).
	Vir_LM	Vir_BSLMM	Spe_LM	Spe_BSLMM
Chromosomes
1	0.372591	0.372591	0.0770878	0.569593
2	0.829122	0.932149	0.0196242	0.745719
3	0.377742	0.552085	0	0.590828
4	0.272719	0.365092	0.0263922	0.307909
5	0.684673	0.93593	0.0125628	0.709799
6	1.01871	1.20026	0	0.393363
7	0.583271	0.521221	0.0496401	0.769422
8	0.367141	0.517931	0.0131122	0.681833
9	0.336623	0.633309	0	0.336623
10	0.771259	0.692156	0.0395517	1.19974
11	0.28488	0.270984	0.0138966	0.979711
12	0.0997407	0.10639	0.0199481	1.13039
13	0.643554	0.470556	0.00691994	0.927271
14	1.15223	0.901101	0.0369303	0.531797
15	0.212164	0.53041	0.0282885	1.50636
16	0.781729	1.11128	0	0.137952
17	0	0	0	0
18	0	0	0	0
Regions
Intergenic	0.547401	0.679305	0.0278464	0.696159
CDS	0.462442	0.492631	0.0164668	0.657299
intron	0.689751	0.682784	0.0139344	0.682784
3' UTR	0.517142	0.708809	0.00723275	0.665413
5' UTR	0.70564	0.612535	0.034302	0.852649
